# Supplementary material for: One-step synthesis of robust nitrogen-doped carbon dots: acid-evoked fluorescence enhancement and their application in Fe3+ detection
Source: Royal Society of Chemistry journal article supplement (doi:10.1039/c5ta05189d), 2015-01-01
Supplement: c5ta05189d1.pdf [file c5ta05189d1.pdf]

Electronic Supplementary Information (ESI)

**One-step synthesis of robust nitrogen-doped carbon dots: acid-evoked fluorescence enhancement and their application for Fe<sup>3+</sup> detection**

Yang Liu<sup>‡a</sup>, Yanan Liu<sup>‡a</sup>, Soo-Jin Park<sup>b</sup>, Yifan Zhang<sup>b</sup>, Taewoo Kim<sup>a</sup>, Suhyeong Chae<sup>a</sup>, Mira Park<sup>c\*</sup>, Hak-Yong Kim<sup>a,c\*\*</sup>

<sup>a</sup> Department of BIN Convergence Technology, Chonbuk National University, Jeonju 561-756, South Korea

<sup>b</sup>Department of Chemistry, Inha University, 100 Inharo, Incheon 402-751, South Korea

<sup>c</sup>Department of Organic Materials and Fiber Engineering, Chonbuk National University, Jeonju 561-756, South Korea

---

\* Corresponding author: Tel: +82-63-270-2351, Fax: +82-63-270-4249.

*E-mail address:* wonderfulmira@jbnu.ac.kr (M. Park)

\*\* Corresponding author: Tel: +82-63-270-2351, Fax: +82-63-270-4249.

*E-mail address:* [khy@jbnu.ac.kr](mailto:khy@jbnu.ac.kr) (H. Y. Kim)

<sup>‡</sup> These authors contributed equally to this work.

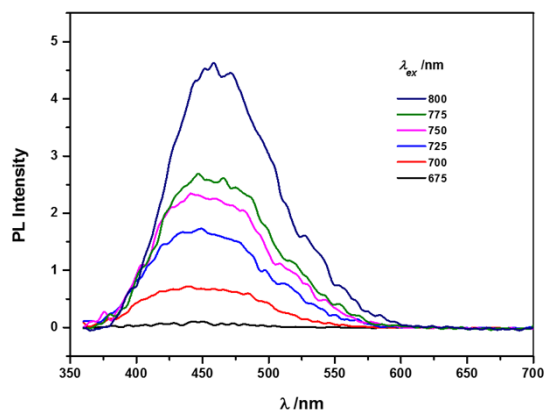

**Fig. S1** Up-conversion PL emission spectra of AAeda-CDs dispersed in H<sub>2</sub>O.

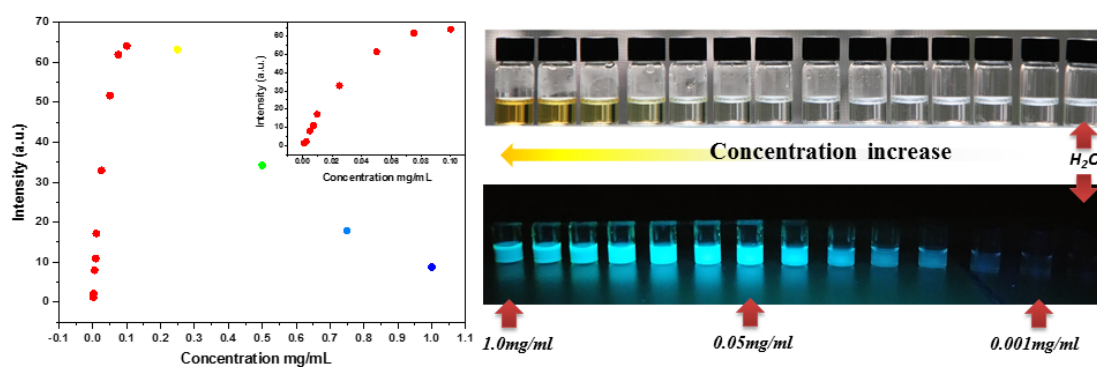

**Fig. S2** PL spectra of the CDs H<sub>2</sub>O solution under different concentrations (left). The right photographs of this CDs aqueous solution: under natural light (top) and 365 nm UV light (down) illumination.

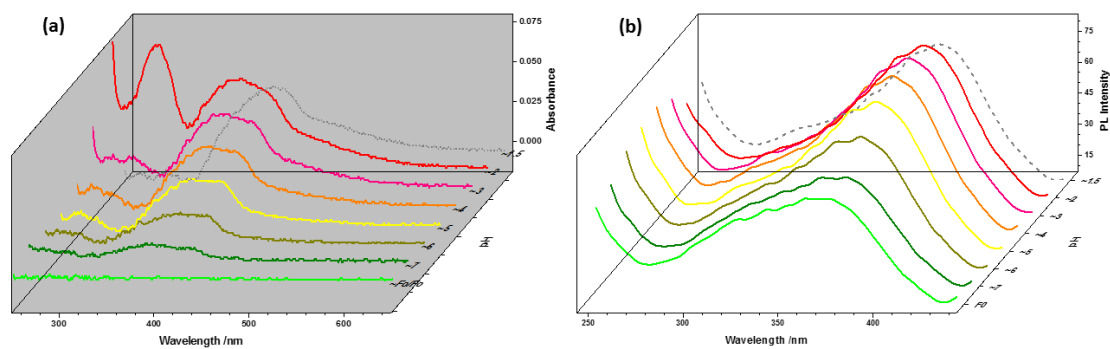

**Fig. S3** spectroscopic evolution of the pH effect on fluorescence performance of AAeda-CDs: (a) UV-Vis comparison to original AAeda-CDs and (b) PLE optical behaviors.

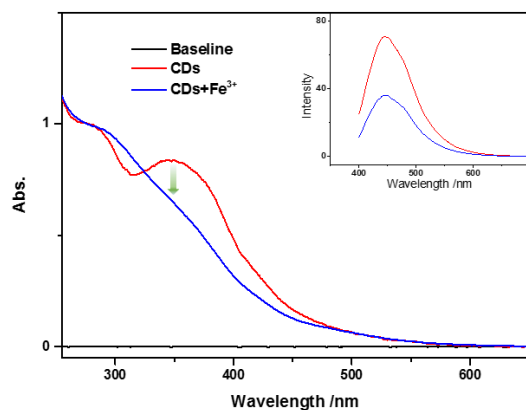

**Fig. S4** UV-Vis and PL spectra changes of the CDs (0.05mg/ml) and that after adding of  $\text{Fe}^{3+}$  (2.5mM).

**Table S1** Lifetime data obtained from the time-resolved decay curves of the CDs (0.05mg/ml) and CDs (0.05mg/ml)+ $\text{Fe}^{3+}$  (2.5mM) mixture ( $\lambda_{\text{ex}}/\lambda_{\text{em}}=380\text{nm}/450\text{nm}$ )

| Sample                | $\tau_1$ (ns) | Percentage (%) | $\tau_2$ (ns) | Percentage (%) | Average $\tau$ (ns) | $\chi^2$ |
|-----------------------|---------------|----------------|---------------|----------------|---------------------|----------|
| CDs                   | 2.33          | 26.38          | 10.11         | 73.62          | 8.06                | 1.201    |
| CDs+ $\text{Fe}^{3+}$ | 2.24          | 27.33          | 9.96          | 72.67          | 7.85                | 1.166    |

**Table S2.** Measurements of  $\text{Fe}^{3+}$  using the proposed CDs nanosensor and ICP method.

|                    | S1 (Found $\pm$ SD, mM)                                      | S2 (Found $\pm$ SD, mM)                                     |
|--------------------|--------------------------------------------------------------|-------------------------------------------------------------|
| <b>This method</b> | $0.01668 \pm 0.00234$                                        | $0.04153 \pm 0.00249$                                       |
| <b>ICP</b>         | $0.01781 \pm 0.00168$<br>( $0.99476 \pm 0.09378\text{ppm}$ ) | $0.04275 \pm 0.00026$<br>( $2.3874 \pm 0.01443\text{ppm}$ ) |

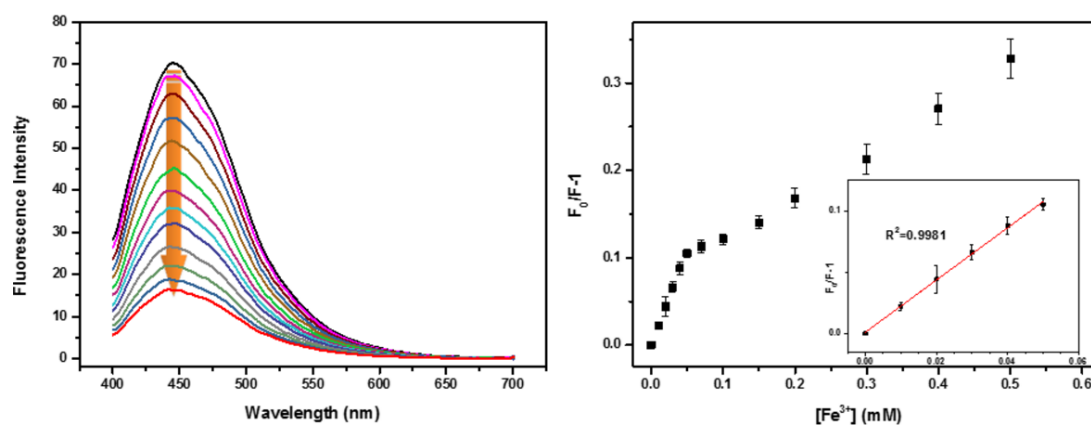

**Fig. S5** Evolution of the fluorescence spectra of AAeda-CDs (0.05mg/mL) in urban river water upon the addition of various mounts of  $\text{Fe}^{3+}$  (0–5.0 mM) (pH = 4.0) (left). The relationship between  $F/F_0 - 1$  and  $\text{Fe}^{3+}$  concentrations. The inset shows the linear range of 0.0–0.05 mM (right).
